# Supplementary material
Source: PubMed Central journal article supplement (PMC6452881)

|             |    |      |      |    |      |      |          |
|-------------|----|------|------|----|------|------|----------|
| 0-30 days   | 17 | 0.95 | 0.23 | 41 | 0.91 | 0.12 | 0.3880   |
| 1-3 months  | 23 | 1.25 | 0.27 | 45 | 1.14 | 0.15 | 0.0340   |
| 4-6 months  | 6  | 1.66 | 0.25 | 20 | 1.31 | 0.15 | 0.0003   |
| 7-12 months | 14 | 1.68 | 0.35 | 22 | 1.44 | 0.16 | 0.0083   |
| 1 year      | 21 | 1.72 | 0.26 | 25 | 1.55 | 0.15 | 0.0082   |
| 2 years     | 13 | 1.90 | 0.27 | 39 | 1.65 | 0.15 | 0.0001   |
| 3 years     | 9  | 2.07 | 0.23 | 27 | 1.74 | 0.13 | < 0.0001 |
| 4 years     | 16 | 1.96 | 0.24 | 47 | 1.82 | 0.13 | 0.0045   |
| 5 years     | 13 | 1.95 | 0.27 | 29 | 1.87 | 0.14 | 0.2112   |
| 6 years     | 10 | 2.07 | 0.14 | 41 | 1.9  | 0.14 | 0.0012   |
| 7 years     | 14 | 2.11 | 0.36 | 32 | 1.94 | 0.15 | 0.0275   |
| 8 years     | 18 | 2.12 | 0.27 | 23 | 1.97 | 0.15 | 0.0295   |
| 9 years     | 11 | 2.14 | 0.26 | 20 | 2.01 | 0.14 | 0.0789   |
| 10 years    | 15 | 2.22 | 0.30 | 27 | 2.05 | 0.13 | 0.0143   |
| 11 years    | 20 | 2.24 | 0.37 | 25 | 2.1  | 0.14 | 0.0879   |
| 12 years    | 18 | 2.27 | 0.41 | 18 | 2.14 | 0.15 | 0.2151   |

|          |    |      |      |    |      |      |        |
|----------|----|------|------|----|------|------|--------|
| 13 years | 31 | 2.27 | 0.37 | 20 | 2.2  | 0.18 | 0.4356 |
| 14 years | 29 | 2.46 | 0.36 | 35 | 2.26 | 0.20 | 0.0067 |
| 15 years | 33 | 2.31 | 0.39 | 25 | 2.33 | 0.20 | 0.816  |
| 16 years | 34 | 2.44 | 0.30 | 34 | 2.39 | 0.21 | 0.4288 |
| 17 years | 12 | 2.38 | 0.42 | 27 | 2.45 | 0.21 | 0.4892 |
| 18 years | 3  | 2.01 | 0.19 | 21 | 2.47 | 0.21 | 0.0073 |

### Supplemental Figure Captions

Supplemental Figure 1 Fractional area change (FAC) values by age in control patients. The dark circles are the mean for each age with the shaded regions representing the one standard deviation above and below the mean.

Supplemental Figure 2 Peak tricuspid annular systolic tissue velocity (S') values by age in control patients. The dark circles are the mean for each age with the shaded regions representing the one standard deviation above and below the mean.

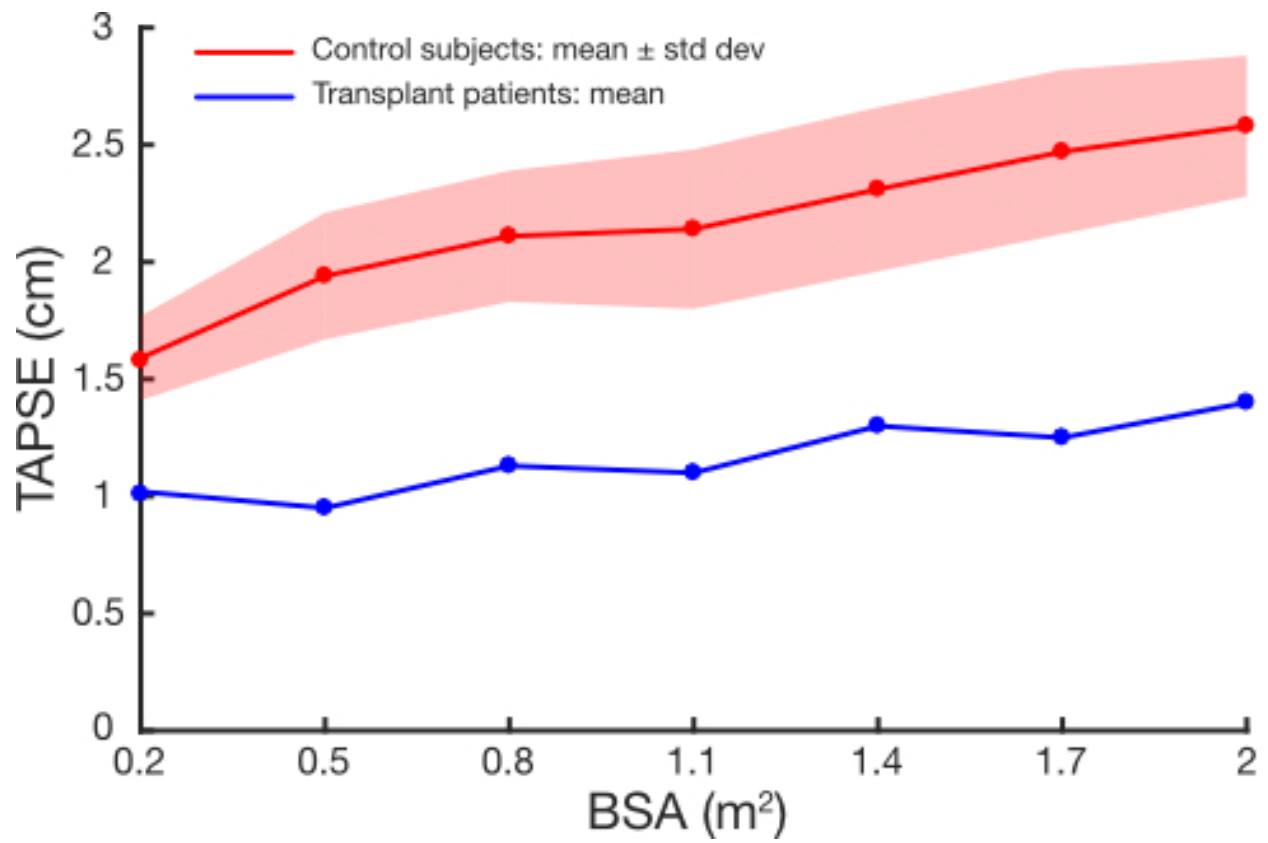

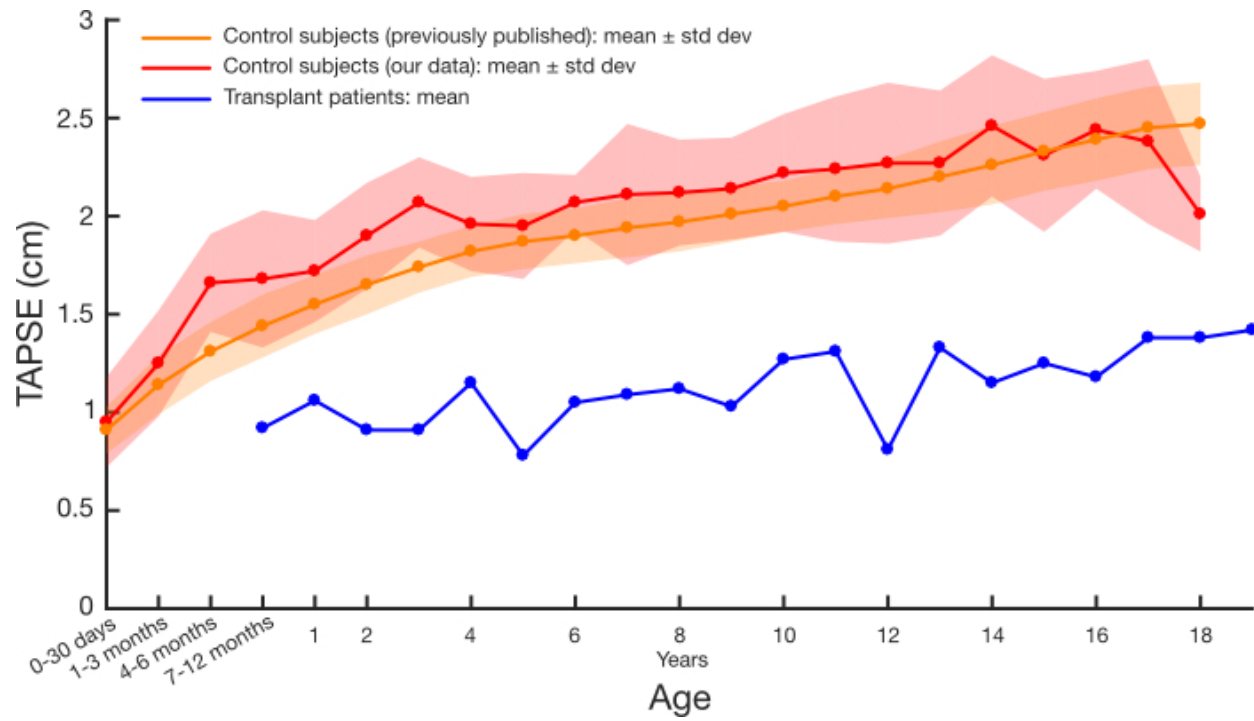

Supplement: NIHMS1519318-supplement-1.pdf [file NIHMS1519318-supplement-1.pdf]
